# Supplementary material for: Sulfur/carbon nanocomposite-filled polyacrylonitrile nanofibers as a long life and high capacity cathode for lithium–sulfur batteries
Source: Royal Society of Chemistry journal article supplement (doi:10.1039/c4ta06976e), 2015-01-01
Supplement: c4ta06976e1.pdf [file c4ta06976e1.pdf]

## Supporting Information

### **Sulfur/Carbon Nanocomposite-filled Polyacrylonitrile Nanofibers as Long Life and High Capacity Cathode for Lithium-Sulfur Batteries**

Jian Ye, Feng He, Jia Nie, Yuliang Cao, Hanxi Yang, Xinping Ai\*

Hubei Key Laboratory of Electrochemical Power Sources, College of Chemistry & Molecular Science, Wuhan University, Wuhan 430072, China

\*CORRESPONDING AUTHOR: E-mail: [xpai@whu.edu.cn](mailto:xpai@whu.edu.cn)

Phone: +86 27-68754526

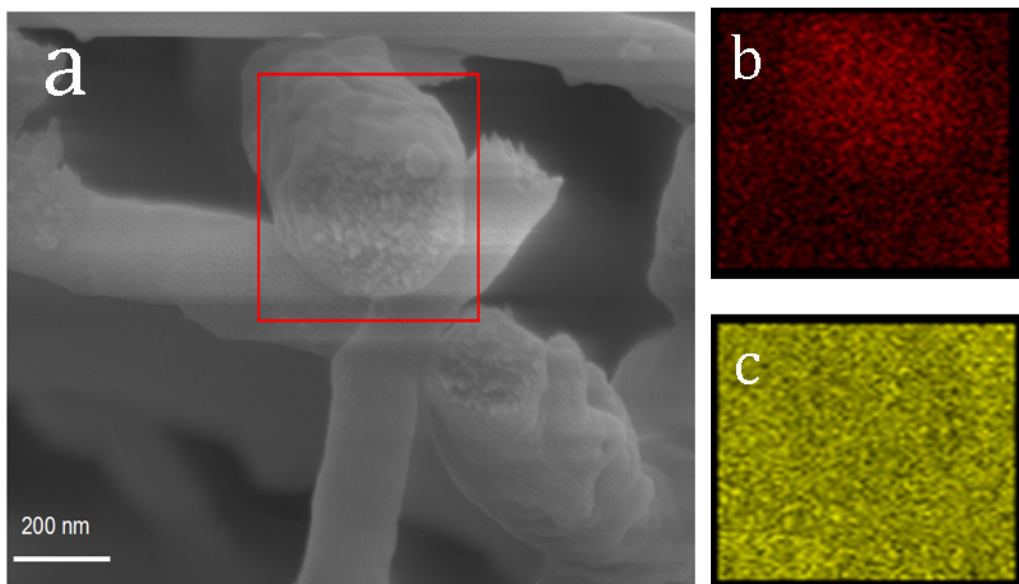

**Figure S1.** The cross-sectional-view SEM image (a); the corresponding elemental mapping of carbon (b) and sulfur (c) for the C/S/PAN nanofiber.

**Figure S2.** SEM images of the C/S/PAN nanofiber electrode after 400 cycles.
